# Supplementary material
Source: PubMed Central journal article supplement (PMC2836725)
Supplement: NIHMS173800-supplement-Supp1.pdf [file NIHMS173800-supplement-Supp1.pdf]

# Supplemental figure 1

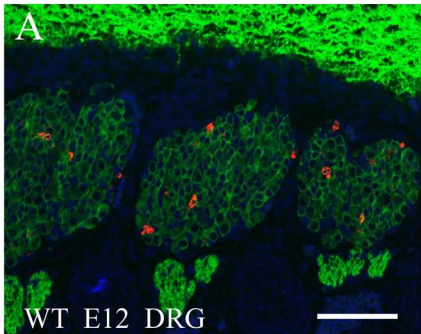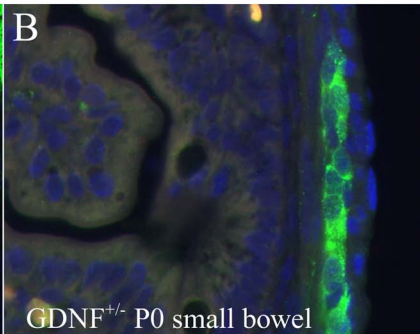

# Supplemental figure 2

Bright field

Phase contrast

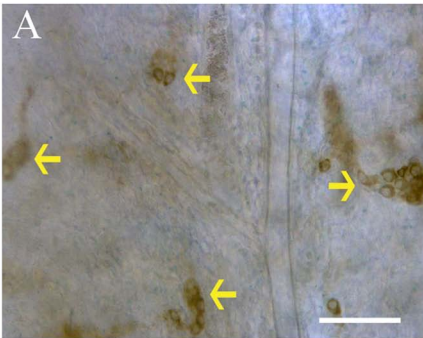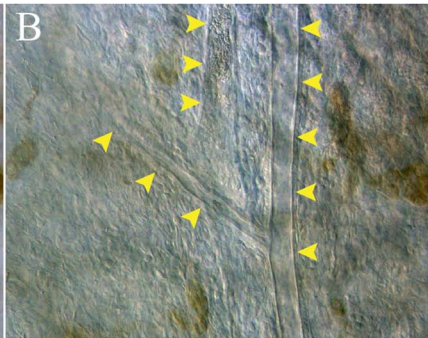

**Supplemental Table 1**  
**GFAP-Gdnf transgenic mice versus WT controls**

| <b><u>Cell Density (cells/mm<sup>2</sup>)</u></b>        | <b><u>WT</u></b> | <b><u>GFAP-Gdnf</u></b> | <b><u>Fold Change</u></b> | <b><u>P value</u></b> |
|----------------------------------------------------------|------------------|-------------------------|---------------------------|-----------------------|
| Esophagus myenteric NADPH-d                              | 6.8 ± 1.0        | 17.9 ± 2.4              | 2.63                      | <0.001                |
| Small bowel myenteric Cuprolinic                         | 104.8 ± 6.1      | 110.7 ± 8.7             | -                         | 0.56                  |
| Small bowel myenteric NADPH-d                            | 39.7 ± 3.4       | 51.7 ± 3.3              | 1.3                       | 0.017                 |
| Small bowel myenteric TH                                 | 0.12 ± 0.05      | 0.20 ± 0.07             | -                         | 0.336                 |
| Small bowel myenteric ChAT                               | 59.2 ± 4.4       | 46.0 ± 6.4              | -                         | 0.148                 |
| Small bowel submucosal acetylcholinesterase              | 115.2 ± 4.7      | 137.3 ± 5.8             | 1.19                      | 0.004                 |
| Colon myenteric Cuprolinic                               | 185.2 ± 8.0      | 236.6 ± 9.4             | 1.28                      | < 0.001               |
| Colon myenteric NADPH-d                                  | 87.4 ± 7.1       | 128.4 ± 6.8             | 1.47                      | <0.001                |
| Colon myenteric ChAT                                     | 94.4 ± 17.6      | 104.4 ± 9.6             | -                         | 0.63                  |
| Colon submucosal acetylcholinesterase                    | 24.3 ± 3.3       | 41.9 ± 4.7              | 1.7                       | 0.007                 |
| <b><u>Cell Size (micrometers squared)</u></b>            |                  |                         |                           |                       |
| Esophagus myenteric NADPH-d                              | 214.0 ± 9.8      | 318.3 ± 9.9             | 1.49                      | <0.001                |
| Small bowel myenteric Cuprolinic                         | 206.5 ± 9.3      | 260.8 ± 9.6             | 1.26                      | <0.001                |
| Small bowel myenteric NADPH-d                            | 170.5 ± 4.4      | 202.7 ± 6.2             | 1.18                      | <0.001                |
| Small bowel myenteric TH                                 | 1099.7 ± 158.7   | 1107 ± 132.1            | -                         | 0.261                 |
| Small bowel submucosal acetylcholinesterase              | 254.5 ± 6.9      | 269.7 ± 7.9             | -                         | 0.181                 |
| Colon myenteric Cuprolinic                               | 213.1 ± 8.7      | 229.3 ± 7.1             | 1.07                      | 0.028                 |
| Colon myenteric NADPH-d                                  | 192.9 ± 5.6      | 245.4 ± 7.2             | 1.27                      | <0.001                |
| Colon submucosal acetylcholinesterase                    | 451.1 ± 17.0     | 453.9 ± 16.1            | -                         | 0.909                 |
| <b><u>Fiber density</u></b>                              |                  |                         |                           |                       |
| Esophagus myenteric NADPH-d fiber bundles                | 0.0 ± 0.0        | 1.96 ± 0.2              | **                        | <0.001                |
| Esophagus myenteric NADPH-d single fibers                | 1.94 ± 0.2       | 4.86 ± 0.6              | 2.52                      | <0.001                |
| Esophagus submucosal NADPH-d                             | 35.8 ± 7.0       | 84.6 ± 14.8             | 2.36                      | 0.018                 |
| Small bowel myenteric NADPH-d fiber bundles              | 3.2 ± 0.2        | 4.2 ± 0.2               | 1.31                      | <0.001                |
| Small bowel myenteric NADPH-d single fibers              | 38.6 ± 1.6       | 41.4 ± 1.4              | -                         | 0.162                 |
| Small bowel myenteric TH fiber bundles                   | 4.4 ± 0.1        | 4.4 ± 0.1               | -                         | 0.823                 |
| Small bowel myenteric TH single fibers                   | 12.2 ± 0.3       | 11.2 ± 0.4              | 0.92                      | 0.035                 |
| Small bowel myenteric ChAT fiber bundles                 | 4.4 ± 0.4        | 5.4 ± 0.2               | 1.23                      | 0.02                  |
| Small bowel myenteric ChAT single fibers                 | 10.6 ± 1.0       | 8.2 ± 1.2               | -                         | 0.07                  |
| Small bowel myenteric acetylcholinesterase fiber bundles | 4.0 ± 0.2        | 4.5 ± 0.2               | 1.13                      | 0.04                  |
| Small bowel myenteric acetylcholinesterase single fibers | 44.6 ± 1.2       | 46.4 ± 1.4              | -                         | 0.292                 |
| Colon myenteric NADPH-d fiber bundles                    | 4.0 ± 0.2        | 5.5 ± 0.2               | 1.37                      | <0.001                |
| Colon myenteric NADPH-d single fibers                    | 51.0 ± 2.0       | 46.6 ± 1.2              | -                         | 0.059                 |
| Colon myenteric acetylcholinesterase fiber bundles       | 5.2 ± 0.2        | 5.7 ± 0.2               | -                         | 0.108                 |
| Colon myenteric acetylcholinesterase single fibers       | 45.4 ± 1.4       | 44.0 ± 1.0              | -                         | 0.448                 |

**GDNF injected mice versus PBS injected controls**

| <b><u>Cell Density (cells/mm<sup>2</sup>)</u></b>        | <b><u>Control</u></b> | <b><u>GDNF</u></b> | <b><u>Fold change</u></b> | <b><u>P value</u></b> |
|----------------------------------------------------------|-----------------------|--------------------|---------------------------|-----------------------|
| Esophagus myenteric NADPH-d                              | 19.5 ± 1.4            | 30.1 ± 3.5         | 1.54                      | 0.031                 |
| Small bowel myenteric Cuprolinic                         | 214.8 ± 41            | 216.7 ± 49         | -                         | 0.978                 |
| Small bowel myenteric NADPH-d                            | 53.7 ± 1.2            | 84.5 ± 7.2         | 1.57                      | 0.006                 |
| Small bowel submucosal acetylcholinesterase              | 209.6 ± 5.7           | 513.5 ± 20.7       | 2.44                      | <0.001                |
| Colon myenteric Cuprolinic                               | 592 ± 83              | 501 ± 25           | -                         | 0.356                 |
| Colon myenteric NADPH-d                                  | 313.5 ± 24            | 266.8 ± 12         | -                         | 0.133                 |
| Colon submucosal acetylcholinesterase                    | 42.3 ± 5.6            | 131.6 ± 18.2       | 3.1                       | 0.003                 |
| <b><u>Cell Size (micrometers squared)</u></b>            |                       |                    |                           |                       |
| Esophagus myenteric NADPH-d                              | 181.5 ± 6             | 311.8 ± 7          | 1.72                      | <0.001                |
| Small bowel myenteric Cuprolinic                         | 203.7 ± 6             | 241.5 ± 7          | 1.19                      | <0.001                |
| Small bowel myenteric NADPH-d                            | 183.4 ± 6             | 229.8 ± 6          | 1.25                      | <0.001                |
| Small bowel submucosal acetylcholinesterase              | 243.5 ± 6             | 265.7 ± 6          | 1.09                      | 0.002                 |
| Colon myenteric Cuprolinic                               | 214.3 ± 6             | 245.6 ± 7          | 1.14                      | 0.002                 |
| Colon myenteric NADPH-d                                  | 203.1 ± 4             | 233.7 ± 5          | 1.15                      | <0.001                |
| Colon submucosal acetylcholinesterase                    | 396.7 ± 14            | 420.4 ± 14         | -                         | 0.142                 |
| <b><u>Fiber density</u></b>                              |                       |                    |                           |                       |
| Esophagus myenteric NADPH-d fiber bundles                | 0.0 ± 0.0             | 4.8 ± 0.26         | **                        | <0.001                |
| Esophagus myenteric NADPH-d single fibers                | 4.0 ± 0.4             | 8.4 ± 0.6          | 2.07                      | <0.001                |
| Small bowel myenteric NADPH-d fiber bundles              | 3.6 ± 0.1             | 4.3 ± 0.1          | 1.19                      | 0.002                 |
| Small bowel myenteric NADPH-d single fibers              | 47.8 ± 1.0            | 46.6 ± 0.6         | -                         | 0.228                 |
| Small bowel myenteric TH fiber bundles                   | 4.2 ± 0.1             | 4.1 ± 0.1          | -                         | 0.809                 |
| Small bowel myenteric TH single fibers                   | 14.1 ± 0.3            | 14.5 ± 0.4         | -                         | 0.431                 |
| Small bowel myenteric acetylcholinesterase fiber bundles | 4.7 ± 0.1             | 5.2 ± 0.2          | 1.11                      | 0.018                 |
| Small bowel myenteric acetylcholinesterase single fibers | 43.6 ± 0.8            | 45.4 ± 1.0         | -                         | 0.257                 |
| Colon myenteric NADPH-d fiber bundles                    | 6.7 ± 0.1             | 6.3 ± 0.1          | 0.94                      | 0.031                 |
| Colon myenteric NADPH-d single fibers                    | 41.2 ± 0.6            | 44.8 ± 0.8         | 1.09                      | <0.001                |
| Colon myenteric acetylcholinesterase fiber bundles       | 5.8 ± 0.2             | 6.1 ± 0.1          | -                         | 0.242                 |
| Colon myenteric acetylcholinesterase single fibers       | 44.8 ± 0.8            | 45.8 ± 0.8         | -                         | 0.317                 |
| Colon myenteric TH fiber bundles                         | 6.0 ± 0.2             | 5.8 ± 0.2          | -                         | 0.337                 |
| Colon myenteric TH single fibers                         | 12.6 ± 0.2            | 12.0 ± 0.2         | -                         | 0.147                 |

**Myo-Gdnf mice versus WT controls**

| <b><u>Cell Density (cells/mm<sup>2</sup>)</u></b> | <b><u>Control</u></b> | <b><u>GDNF</u></b> | <b><u>Fold change</u></b> | <b><u>P value</u></b> |
|---------------------------------------------------|-----------------------|--------------------|---------------------------|-----------------------|
| Esophagus myenteric NADPH-d (all neurons)         | 7.8 ± 1.0             | 14.5 ± 0.5         | 1.85                      | 0.004                 |
| Small bowel myenteric Cuprolinic                  | 125.3 ± 7.3           | 155.7 ± 18.2       | -                         | 0.197                 |
| Small bowel myenteric NADPH-d                     | 32.3 ± 1.5            | 39.4 ± 1.5         | -                         | 0.325                 |
| Small bowel submucosal acetylcholinesterase       | 146.1 ± 7.8           | 135.3 ± 5.4        | -                         | 0.319                 |
| Colon myenteric Cuprolinic                        | 289.9 ± 14.0          | 306.1 ± 43.1       | -                         | 1                     |
| Colon submucosal acetylcholinesterase             | 27.9 ± 3.6            | 34.6 ± 1.8         | -                         | 0.166                 |

**Cell Size (micrometers squared)**

|                                             |            |            |   |       |
|---------------------------------------------|------------|------------|---|-------|
| Esophagus myenteric NADPH-d                 | 238.9 ± 24 | 296.1 ± 29 | - | 0.199 |
| Small bowel myenteric Cuprolinic            | 182.1 ± 12 | 163.2 ± 25 | - | 0.531 |
| Small bowel myenteric NADPH-d               | 212.0 ± 15 | 237.2 ± 45 | - | 0.626 |
| Small bowel submucosal acetylcholinesterase | 218.2 ± 9  | 214.0 ± 13 | - | 0.801 |
| Colon myenteric Cuprolinic                  | 189.2 ± 24 | 176.4 ± 31 | - | 0.762 |
| Colon submucosal acetylcholinesterase       | 369.4 ± 32 | 324.9 ± 11 | - | 0.263 |

**Fiber density**

|                                                          |            |            |      |        |
|----------------------------------------------------------|------------|------------|------|--------|
| Esophagus myenteric NADPH-d single fibers                | 7.8 ± 2.4  | 37.4 ± 4.5 | 4.79 | <0.001 |
| Esophagus myenteric NADPH-d submucosal                   | 22.6 ± 1.3 | 21.6 ± 1.3 | -    | 0.598  |
| Small bowel myenteric NADPH-d fiber bundles              | 6.9 ± 0.5  | 7.5 ± 1.0  | -    | 0.573  |
| Small bowel myenteric NADPH-d single fibers              | 45.4 ± 2.6 | 48.8 ± 2.6 | -    | 0.385  |
| Small bowel myenteric acetylcholinesterase fiber bundles | 9.9 ± 0.8  | 9.6 ± 1.0  | -    | 0.801  |
| Small bowel myenteric acetylcholinesterase single fibers | 45.0 ± 5.0 | 41.0 ± 4.2 | -    | 0.584  |
| Colon myenteric acetylcholinesterase fiber bundles       | 12.8 ± 1.4 | 12.1 ± 1.7 | -    | 0.779  |
| Colon myenteric acetylcholinesterase single fibers       | 37.6 ± 4.6 | 43.0 ± 3.2 | -    | 0.387  |

**Gdnf +/- mice versus WT controls**

| <b><u>Cell Density (cells/mm<sup>2</sup>)</u></b> | <b><u>Control</u></b> | <b><u>Gdnf +/-</u></b> | <b><u>Fold change</u></b> | <b><u>P value</u></b> |
|---------------------------------------------------|-----------------------|------------------------|---------------------------|-----------------------|
| Esophagus myenteric NADPH-d                       | 14.3 ± 1.0            | 3.6 ± 1.0              | 0.25                      | < 0.001               |
| Small bowel myenteric NADPH-d                     | 37.1 ± 4.9            | 20.1 ± 2.9             | 0.54                      | 0.043                 |
| Small bowel myenteric ChAT                        | 72.5 ± 4.2            | 34.5 ± 5.2             | 0.48                      | 0.003                 |

**Fiber density**

|                                             |            |            |      |       |
|---------------------------------------------|------------|------------|------|-------|
| Esophagus myenteric NADPH-d single fibers   | 7.1 ± 1.4  | 2.6 ± 0.6  | 0.37 | 0.047 |
| Small bowel myenteric NADPH-d single fibers | 52.0 ± 2.0 | 42.4 ± 1.2 | 0.82 | 0.026 |
